# Supplementary material
Source: PubMed Central journal article supplement (PMC5583467)
Supplement: CVI.00062-17_zcd999095501s1.pdf [file CVI.00062-17_zcd999095501s1.pdf]

## Supplemental Material

**Table S1.** List of HIV Env-specific antigens used in BAMA antigen panel against maternal and infant plasma samples.

|                                | <b>Antigen</b>                                                                        | <b>Sequence/description</b>                                                                                                                                                                                                                                                          |
|--------------------------------|---------------------------------------------------------------------------------------|--------------------------------------------------------------------------------------------------------------------------------------------------------------------------------------------------------------------------------------------------------------------------------------|
| <b>Env glycoproteins</b>       | 4403 BMC5 gp120<br>A244 gp120 gDneg/293F<br>1086D7 gp120K160N                         | - Clade C postnatal T/F Env glycoprotein gp120<br>- RV144 vaccine strain Env glycoprotein gp120<br>- Clade C T/F Env glycoprotein gp120                                                                                                                                              |
|                                | ConC_gp120_WT<br><br>Con6gp120/B                                                      | - Consensus of subtype C Env sequences available in 2001 in the Los Alamos HIV sequence database<br><br>- Artificial multiclade consensus Env gp120                                                                                                                                  |
| <b>Scaffold Env constructs</b> | gp70_C.1086CV1/V2<br>gp70B.caseA V1V2/293F<br><br>gp70_B.caseA2_V1V2/169K<br>gp70MNV3 | - Scaffold V1V2 construct from the T/F C. 1086 strain<br>- Scaffold clade B V1V2 construct (RV144 immune correlate of risk)<br>- Scaffold clade B V1V2 construct with lysine mutation at position 169 (RV144 immune correlate of risk)<br>- Scaffold V3 construct from the MN strain |
| <b>Peptides</b>                | Bio-V2.1086C (clade C V2 peptide)<br>Bio-V2.B (clade B V2 peptide)                    | KKKTELKDKKHKVHALFYKLDVVP<br><br>KKKTSIRDKVQKEYALFYKLDVVP                                                                                                                                                                                                                             |
|                                | Bio-V3.C (clade C V3 peptide)<br>Bio-V3.B (clade B V3 peptide)                        | KKKNNTRKSIRIGPGQTFYATGDIIGDIRQAHC<br>KKKNNTRKSIHIGPGRFYATGDIIGDIRQAHC<br>(immune correlate of perinatal transmission risk in clade B WITS cohort)                                                                                                                                    |
|                                | Clade C MPER                                                                          | KKKNEQELLELDKWASLWNWFNITNWLW                                                                                                                                                                                                                                                         |

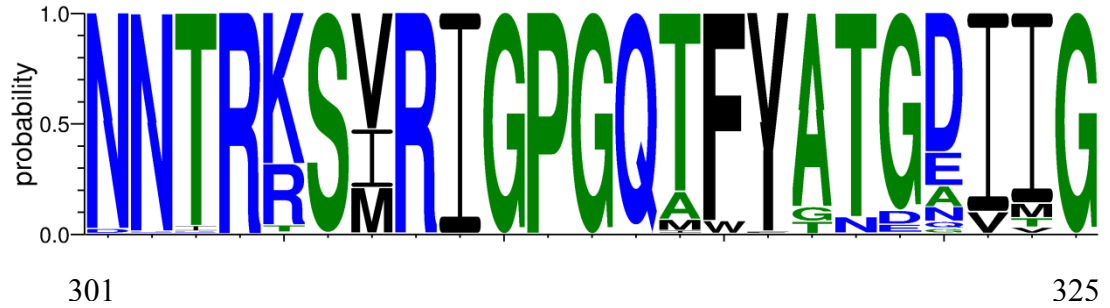

Bio-V3.C Peptide: N N T R K S I R I G P G Q T F Y A T G D I I G

**Figure S1.** Amino acid residue frequency within the V3 loop from 697 HIV Env sequences isolated from clade C virus-infected patients, compared against the Bio-V3.C peptide used in binding assays. Amino acid residues 301 through 325 are depicted, as labeled by the HXB2 numbering scheme.
